# Supplementary material for: Controlled phase-separation effect for enhanced optical refrigeration in yttrium-aluminosilicate glasses
Source: Royal Society of Chemistry journal article supplement (doi:10.1039/d3tc01319g), 2023-01-01
Supplement: d3tc01319g1.pdf [file d3tc01319g1.pdf]

### Supplementary information

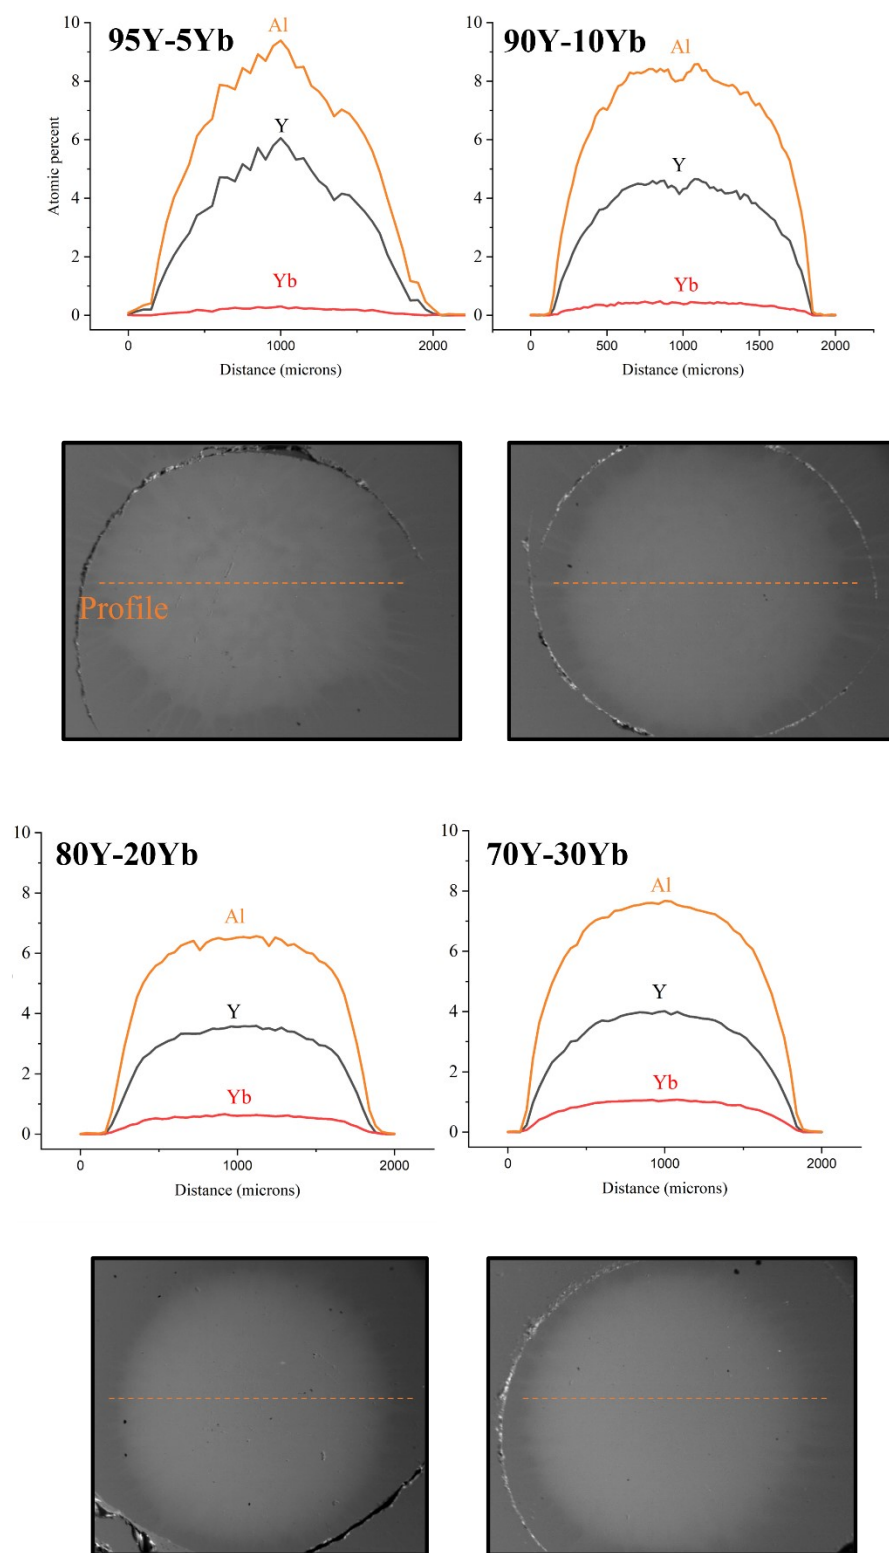

Figure 1. Electron probe analysis measurements of YAS glass samples

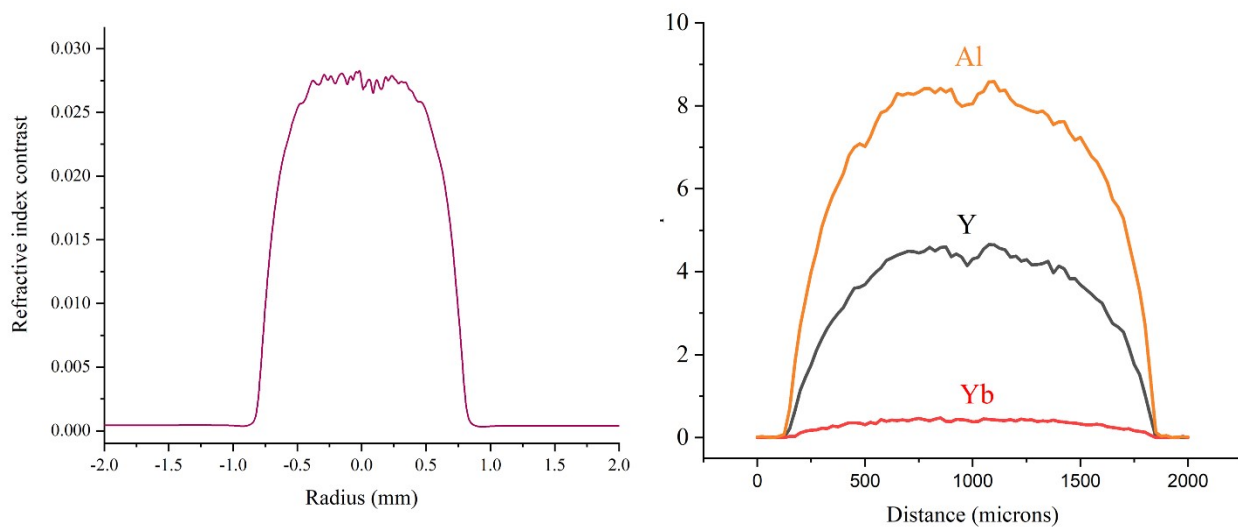

Figure 2. Refractive index profile, extracted from preform 90Y-10Yb

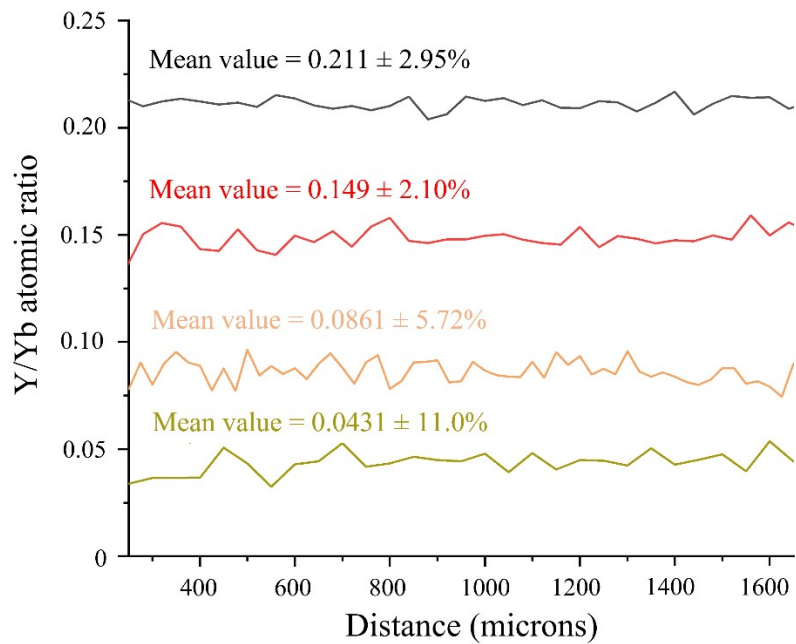

Figure 3. Experimental ratio of Yttrium to ytterbium, calculated from EPMA data

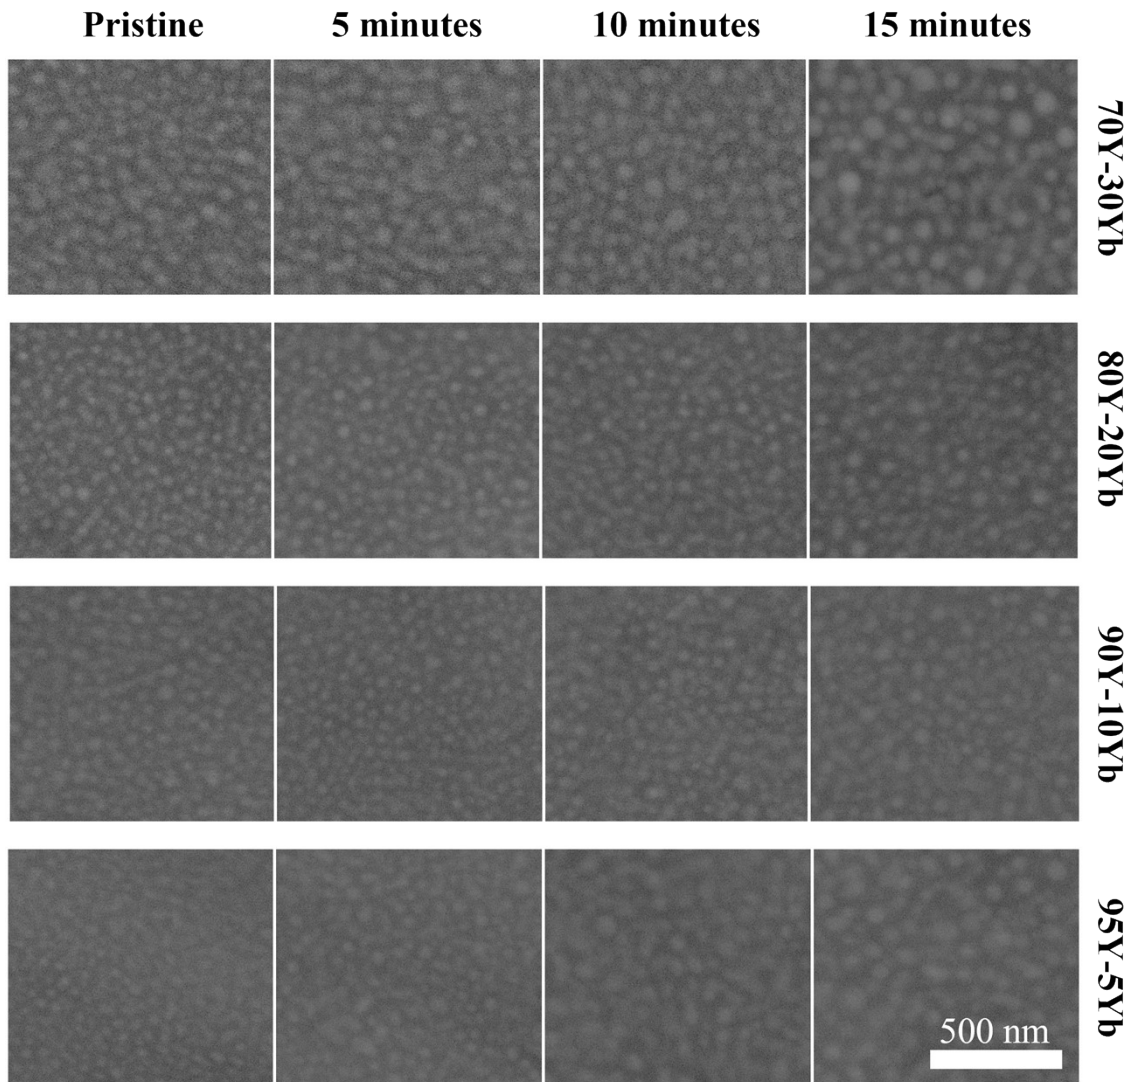

Figure 4. SEM images of sample core of all samples after isothermal treatment at 1400°C for 0, 5, 10 and 15 minutes.



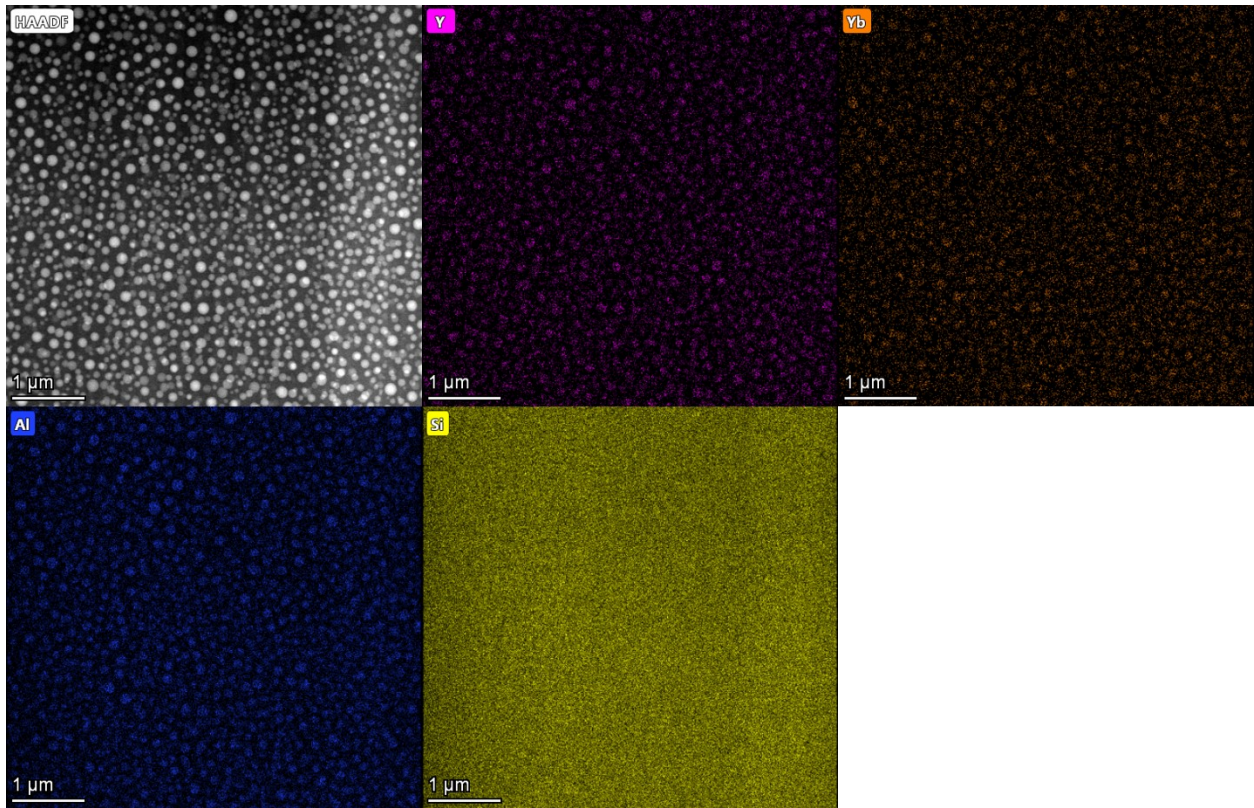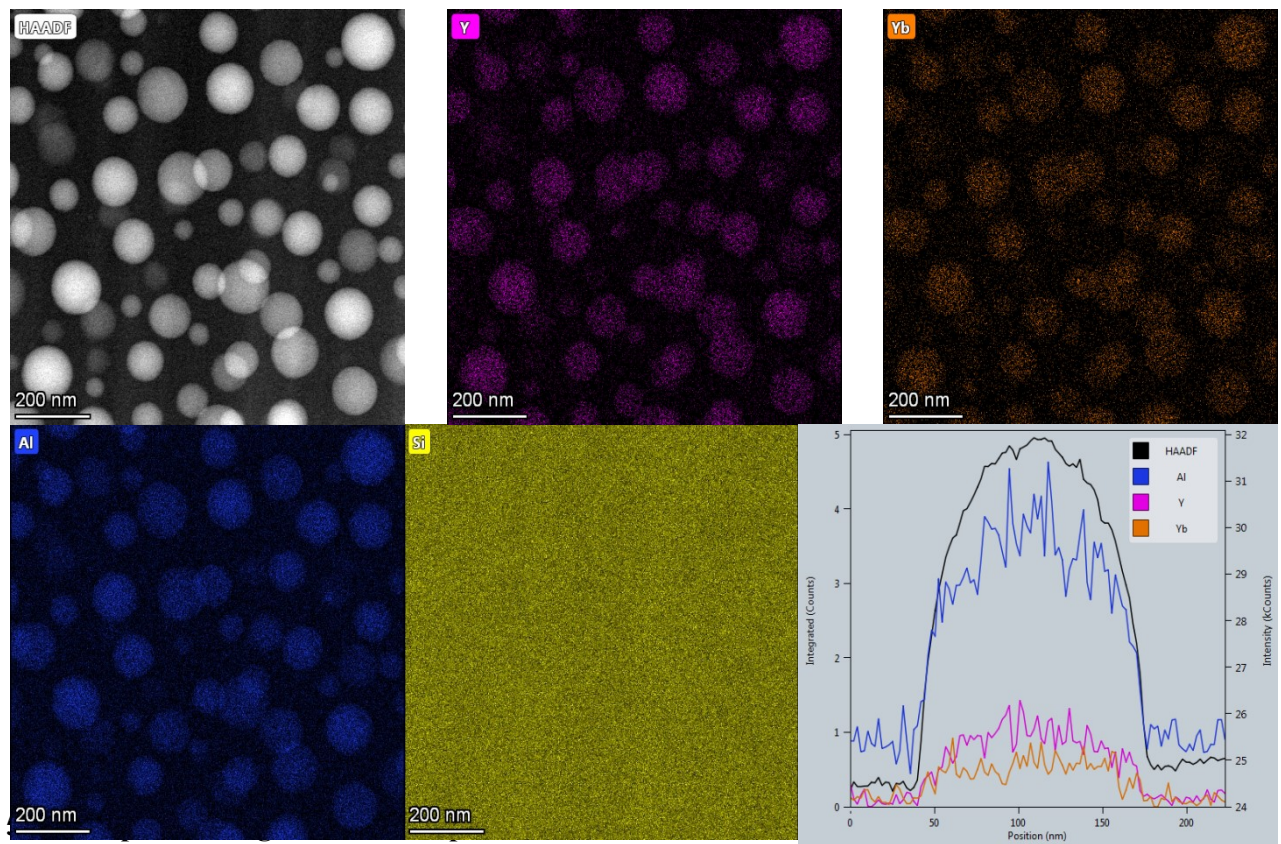

Figure 5. Additional TEM images with different magnification and their respective EDX profile/cartography

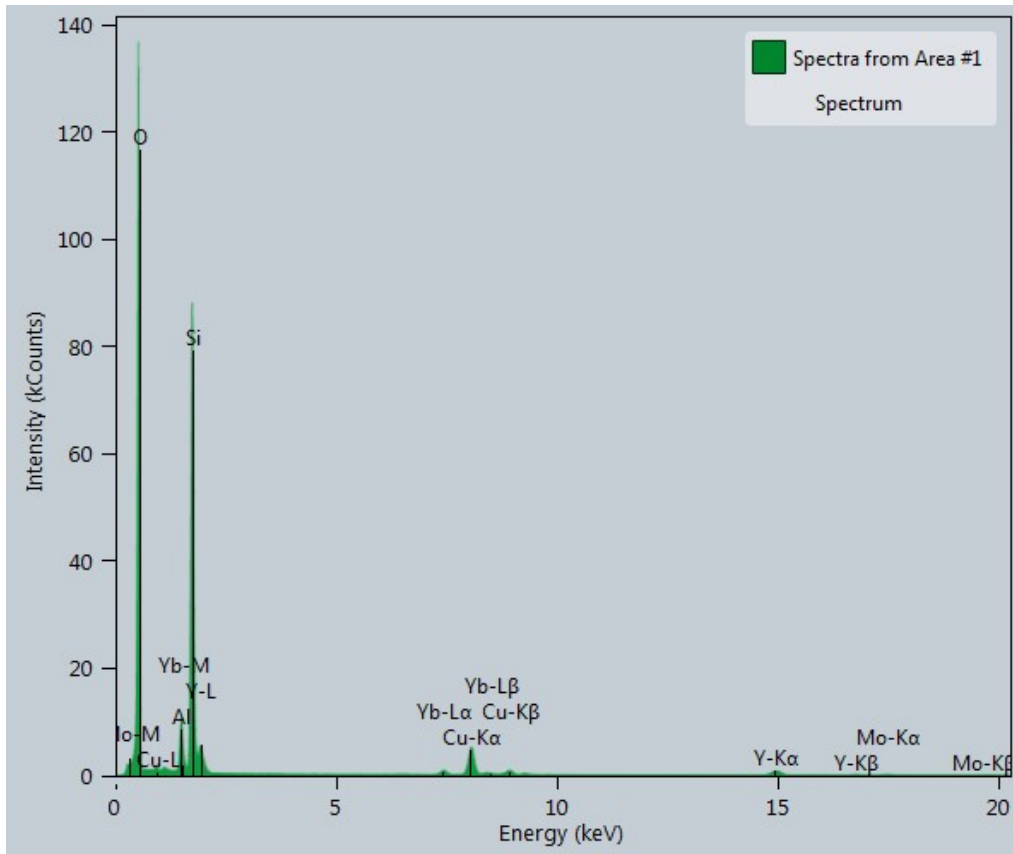

Figure 6. EDX spectra of phase separated regions

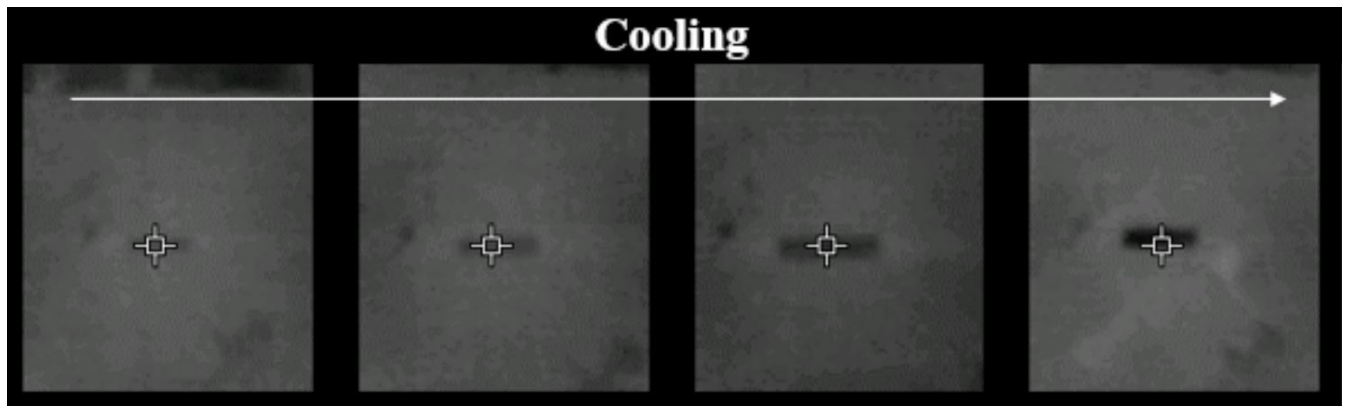

Figure 7. Thermal images of cooling sample (90Y-10Yb) using FLIR camera

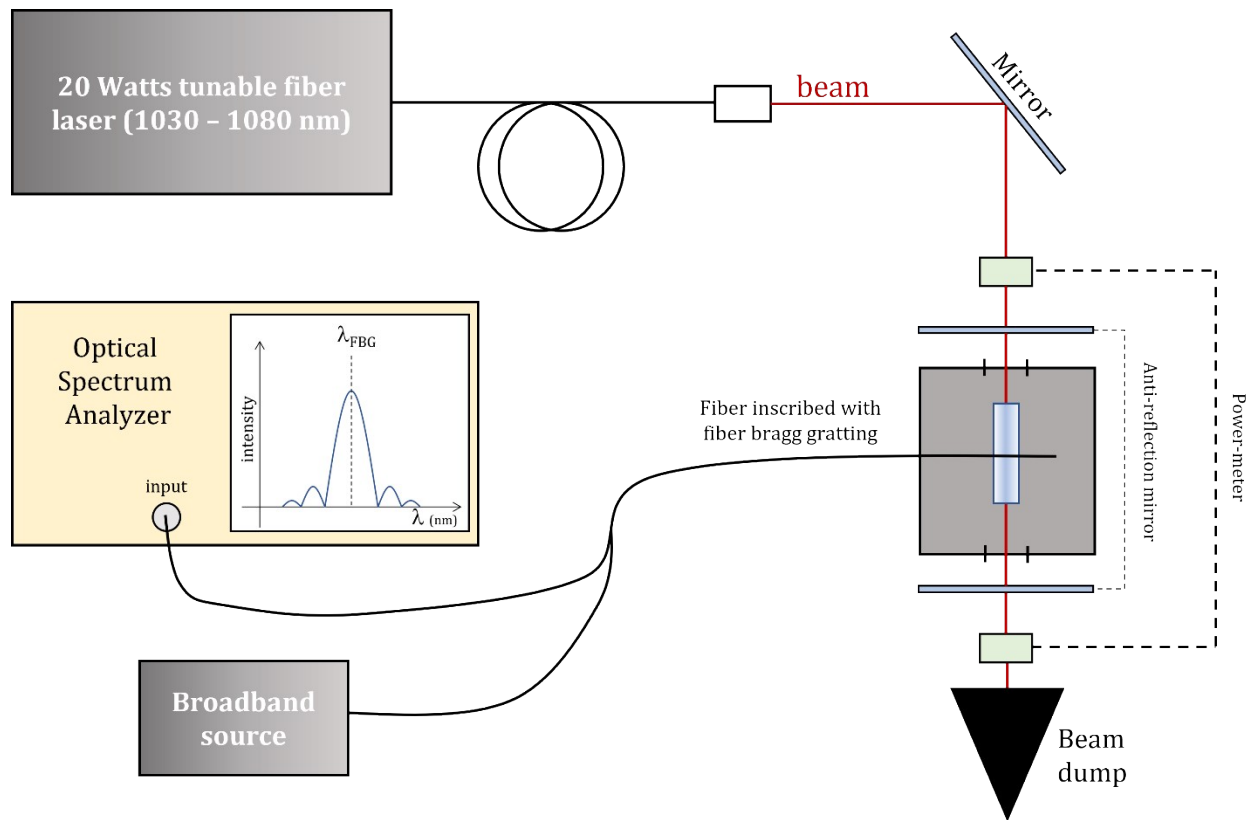

Figure 8. Schematic of optical thermometry setup used for optical refrigeration measurements.
